# Supplementary material for: Aquatic insect community structure revealed by eDNA metabarcoding derives indices for environmental assessment
Source: PeerJ. 2020 Jun 11;8:e9176. doi: 10.7717/peerj.9176 (PMC7293852; doi:10.7717/peerj.9176)
Supplement: Supplemental Information 4 [file peerj-08-9176-s004.xlsx]

## Sheet: PJ3_Table S4
Table S4_raw data of aquatic insect collection by net sampling
	Sampling sites (H1-N3) were ordered along river order.
		July						November
Order	Family	H1	N1	H2	N2	H3	N3	H1	N1	H2	N2	H3	N3
Ephemeroptera	Ameletidae	0	0	0	0	0	0	0	0	4	0	0	0			: No detection
Ephemeroptera	Baetidae	0	26	23	47	26	20	11	15	28	13	37	12			: 1-10 individuals
Ephemeroptera	Ephemerellidae	3	70	23	29	17	7	3	80	289	80	248	30			: 11-50 individuals
Ephemeroptera	Ephemeridae	0	0	0	0	0	7	4	2	4	0	3	1			: 51-100 individuals
Ephemeroptera	Heptageniidae	1	42	20	23	8	5	4	6	112	12	5	6			: 101- individuals
Ephemeroptera	Isonychiidae	0	0	0	3	0	0	0	0	0	0	4	1			: not detected by eDNA through all steps.
Ephemeroptera	Leptophlebiidae	0	86	3	19	13	15	1	0	0	0	0	0			: not detected by eDNA after subsampling.
Ephemeroptera	Potamanthidae	0	0	2	0	40	0	0	0	0	0	0	0
Ephemeroptera	Siphlonuridae	0	1	0	0	0	0	0	0	0	0	0	0
Plecoptera	Chloroperlidae	1	1	0	1	0	0	16	24	54	10	2	2
Plecoptera	Nemouridae	0	0	0	0	0	0	4	0	0	0	0	0
Plecoptera	Perlidae	3	2	1	8	0	3	0	4	0	5	0	1
Plecoptera	Perlodidae	0	0	0	0	0	0	3	1	4	7	2	2
Trichoptera	Apataniidae	0	0	0	0	0	0	5	0	0	0	0	0
Trichoptera	Brachycentridae	0	0	0	1	0	0	0	0	0	0	0	0
Trichoptera	Goeridae	0	0	0	0	0	1	0	0	0	0	0	0
Trichoptera	Hydropsychidae	1	20	27	32	14	6	18	8	36	21	39	21
Trichoptera	Lepidostomatidae	0	6	3	5	0	0	0	0	0	0	0	0
Trichoptera	Limnocentropodidae	0	0	0	0	0	0	0	0	0	0	0	1
Trichoptera	Philopotamidae	0	0	0	0	1	0	0	0	0	0	0	0
Trichoptera	Phryganopsychidae	0	0	0	0	0	0	0	0	1	0	0	0
Trichoptera	Rhyacophilidae	0	0	1	1	1	0	2	8	10	19	16	2
Trichoptera	Stenopsychidae	4	2	5	4	6	5	5	1	3	7	54	16
Diptera	Athericidae	0	2	3	0	0	0	0	0	1	0	0	1
Diptera	Blephariceridae	0	0	0	0	0	0	0	11	15	0	0	0
Diptera	Chironomidae	1	5	11	4	132	11	17	35	52	227	40	253
Diptera	Simuliidae	0	1	9	2	0	0	0	53	263	25	20	0
Diptera	Tipulidae	2	9	20	6	28	6	4	16	10	4	11	8
Coleoptera	Gyrinidae	0	0	0	0	0	0	1	0	0	0	0	0
Coleoptera	Hydrophilidae	0	0	0	0	0	1	0	0	0	0	0	0
Coleoptera	Psephenidae	0	3	0	25	1	28	0	4	1	1	7	5
Coleoptera	Ptilodactylidae	0	40	18	19	24	28	0	4	22	23	40	16
Coleoptera	Scirtidae	0	0	0	0	0	0	1	0	0	0	0	0
Odonata	Gomphidae	0	1	1	1	0	0	0	1	0	0	1	0
Megaloptera	Corydalidae	0	0	0	0	0	0	1	0	1	0	0	1
	Abundance total	16	317	170	230	311	143	100	273	910	454	529	379
	Taxa total	8	17	16	18	13	14	17	17	19	14	16	18
