# Supplementary material for: Aquatic insect community structure revealed by eDNA metabarcoding derives indices for environmental assessment
Source: PeerJ. 2020 Jun 11;8:e9176. doi: 10.7717/peerj.9176 (PMC7293852; doi:10.7717/peerj.9176)
Supplement: Supplemental Information 6 [file peerj-08-9176-s006.xlsx]

## Sheet: PJ3_Table S6 (genus)
	Table S6_Presence-Absence table of metabarcoding results at genus level using 97% sequence identity threshold.
				July							November
	Order	Family	Genus	H1	N1	H2	N2	H3	N3		H1	N1	H2	N2	H3	N3
	E	Ameletidae	Ameletus	0	0	0	0	0	0		10	0	0	0	0	0			presence
	E	Baetidae	Baetis	0	4	1	0	2	0		0	0	0	0	2	0			absence
	E	Baetidae	Labiobaetis	0	0	0	0	0	0		0	0	0	0	1	0
	E	Baetidae	NA	0	0	0	1	19	2		0	0	0	4	9	9
	E	Baetidae	Nigrobaetis	0	0	3	0	0	0		0	0	0	0	0	0
	E	Baetidae	Tenuibaetis	0	4	0	2	22	13		0	0	1	0	7	0
	E	Ephemerellidae	Drunella	24	0	0	2	0	0		2	23	39	11	23	3
	E	Ephemerellidae	Ephemerella	0	0	0	0	1	0		9	0	0	0	0	0
	E	Ephemerellidae	NA	0	0	0	0	5	2		0	0	0	0	0	0
	E	Heptageniidae	Epeorus	68	16	18	11	1	1		23	0	1	0	0	0
	E	Heptageniidae	Rhithrogena	0	0	0	0	1	0		5	0	0	0	0	0
	E	Leptophlebiidae	Paraleptophlebia	1	0	0	0	0	0		2	0	0	0	0	0
	E	Polymitarcyidae	Ephoron	0	0	0	0	0	4		0	0	0	0	0	0
	E	Potamanthidae	Potamanthus	0	0	0	0	4	0		0	0	0	0	0	0
	P	Nemouridae	Amphinemura	0	0	0	0	0	0		11	0	0	0	0	0
	P	Nemouridae	Nemoura	3	0	0	0	0	0		0	0	0	0	0	0
	P	Nemouridae	Protonemura	0	0	0	1	0	0		1	0	0	0	0	0
	T	Glossosomatidae	Glossosoma	9	0	0	0	0	0		3	0	1	1	0	0
	T	Goeridae	Goera	1	2	0	5	0	2		0	0	0	0	0	0
	T	Hydrobiosidae	Apsilochorema	1	2	0	0	0	0		0	0	0	0	0	0
	T	Hydropsychidae	Ceratopsyche	0	3	2	0	0	0		0	0	0	0	0	0
	T	Hydropsychidae	Cheumatopsyche	0	2	2	0	2	2		0	0	0	0	0	0
	T	Hydropsychidae	Hydropsyche	0	0	1	0	0	0		0	0	0	0	0	0
	T	Lepidostomatidae	Lepidostoma	0	0	0	0	0	0		34	0	0	0	0	0
	T	Leptoceridae	Mystacides	0	0	0	1	0	0		0	0	0	0	0	0
	T	Philopotamidae	Kisaura	0	0	3	0	0	0		0	0	0	0	0	0
	T	Phryganeidae	Eubasilissa	9	0	0	0	0	0		0	0	0	0	0	0
	T	Psychomyiidae	Paduniella	0	3	0	0	0	0		0	0	0	0	0	0
	T	Stenopsychidae	Stenopsyche	1	7	6	1	2	0		0	1	0	0	0	0
	D	Chironomidae	Ablabesmyia	0	0	0	0	1	0		0	0	0	0	0	0
	D	Chironomidae	Brillia	0	0	0	5	0	0		0	0	0	0	0	0
	D	Chironomidae	Cardiocladius	0	0	0	0	3	3		0	0	0	1	1	3
	D	Chironomidae	Chironomus	0	0	0	0	0	0		0	0	0	1	0	2
	D	Chironomidae	Cladotanytarsus	4	11	9	0	6	3		0	0	0	0	5	5
	D	Chironomidae	Cricotopus	0	0	0	1	5	1		0	3	0	6	8	10
	D	Chironomidae	Demicryptochironomus	0	0	0	1	0	0		0	0	0	0	0	0
	D	Chironomidae	Eukiefferiella	0	1	2	0	0	0		0	0	2	0	0	0
	D	Chironomidae	Glyptotendipes	0	0	0	0	0	1		0	0	0	0	0	0
	D	Chironomidae	Limnophyes	0	2	0	0	0	0		0	0	0	0	0	0
	D	Chironomidae	Micropsectra	2	0	0	0	0	0		0	0	0	0	0	0
	D	Chironomidae	Microtendipes	0	7	9	5	6	0		10	0	1	0	0	0
	D	Chironomidae	NA	0	0	2	0	0	2		0	0	0	0	0	0
	D	Chironomidae	Neozavrelia	0	5	21	0	13	3		0	0	33	0	3	2
	D	Chironomidae	Orthocladius	0	0	0	0	0	0		27	93	55	83	32	96
	D	Chironomidae	Parametriocnemus	0	4	1	0	0	0		0	0	0	0	0	0
	D	Chironomidae	Paratrichocladius	0	0	0	0	1	0		0	0	0	0	0	0
	D	Chironomidae	Polypedilum	0	3	6	2	4	5		3	0	0	1	1	0
	D	Chironomidae	Potthastia	0	0	0	0	3	0		0	0	0	0	0	0
	D	Chironomidae	Rheocricotopus	0	0	0	0	1	0		0	0	0	0	0	2
	D	Chironomidae	Rheopelopia	0	2	3	6	0	2		0	0	0	0	0	0
	D	Chironomidae	Rheotanytarsus	0	0	1	0	0	0		0	0	0	0	0	0
	D	Chironomidae	Synorthocladius	0	8	5	23	0	1		0	4	2	1	0	1
	D	Chironomidae	Tanytarsus	0	2	0	9	19	17		0	0	0	0	8	4
	D	Chironomidae	Thienemanniella	0	1	0	7	6	51		0	0	0	0	0	0
	D	Chironomidae	Trissopelopia	4	0	0	2	0	0		0	0	0	0	1	0
	D	Chironomidae	Tvetenia	3	0	5	9	5	0		0	1	0	2	8	4
	D	Culicidae	Culex	0	0	0	1	0	0		0	0	0	0	0	0
	D	Muscidae	Lispe	0	0	0	2	0	0		0	0	0	0	0	0
	D	Sciaridae	Chaetosciara	4	0	0	0	0	0		0	0	0	0	0	0
	D	Simuliidae	Simulium	0	56	46	51	17	34		3	25	13	36	41	9
	D	Syrphidae	Dideoides	0	1	0	0	0	0		0	0	0	0	0	0
	C	Scirtidae	Hydrocyphon	0	0	0	0	0	0		5	0	0	0	0	0
	C	Staphylinidae	NA	0	0	0	0	0	0		0	0	0	1	0	0
	H	Acanthosomatidae	Acanthosoma	6	0	0	0	0	0		0	0	0	0	0	0
	H	Aphididae	Hyalopterus	0	3	0	0	0	0		0	0	0	0	0	0
	H	Aphididae	Pleotrichophorus	1	0	4	0	0	0		0	0	0	0	0	0
	H	Aphididae	Yamatocallis	2	0	0	0	0	0		0	0	0	0	0	0
	H	Cicadidae	Graptopsaltria	0	0	0	0	1	0		0	0	0	0	0	0
	H	Cicadidae	Tanna	4	0	0	0	0	0		0	0	0	0	0	0
	H	Hormaphididae	Hamamelistes	0	1	0	0	0	0		0	0	0	0	0	0
	H	Lachnidae	Lachnus	0	0	0	2	0	0		0	0	0	0	0	0
	H	Lachnidae	Longistigma	0	0	0	0	0	1		0	0	0	0	0	0
	H	Pemphigidae	Paracolopha	2	0	0	0	0	0		0	0	2	2	0	0
	O	Epiophlebiidae	Epiophlebia	0	0	0	0	0	0		2	0	0	0	0	0
	O	Gomphidae	Davidius	1	0	0	0	0	0		0	0	0	0	0	0
